# Supplementary material for: Long-lived spin-triplet excitons in manganese complexes for room-temperature phosphorescence
Source: Royal Society of Chemistry journal article supplement (doi:10.1039/d2dt03831e), 2023-01-01
Supplement: d2dt03831e1.pdf [file d2dt03831e1.pdf]

## Supporting Information

### Long-Lived Spin-Triplet Excitons in Manganese Complexes for Room-Temperature Phosphorescence

**Mi-Hee Jung**<sup>\*, †</sup>

□Department of Nanotechnology and Advanced Materials Engineering, Sejong University,  
209, Neungdong-ro, Gwangjin-gu, Seoul 05006, Republic of Korea; Fax: +82-2-3408-4342;  
Tel: +82-2-6935-2597

\*To whom correspondence should be addressed.

E-mail: [mhjung@sejong.ac.kr](mailto:mhjung@sejong.ac.kr)

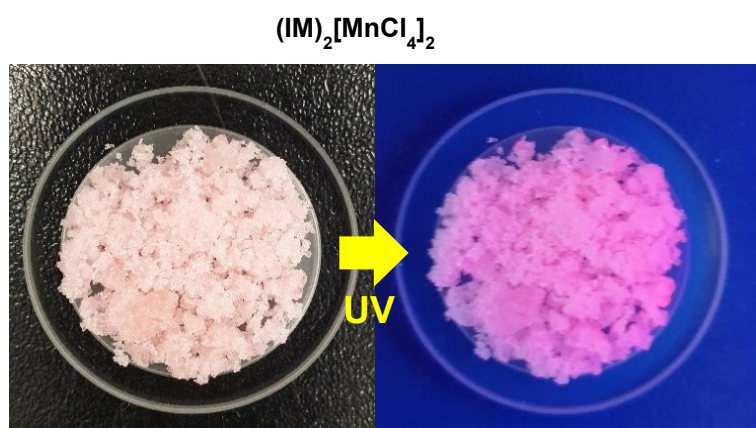

**Figure S1.** The photographs of the weak red emissions from the  $(\text{IM})_2[\text{MnCl}_4]_2$  single crystal powders under UV light with  $\lambda_{\text{ex}} = 365 \text{ nm}$ .

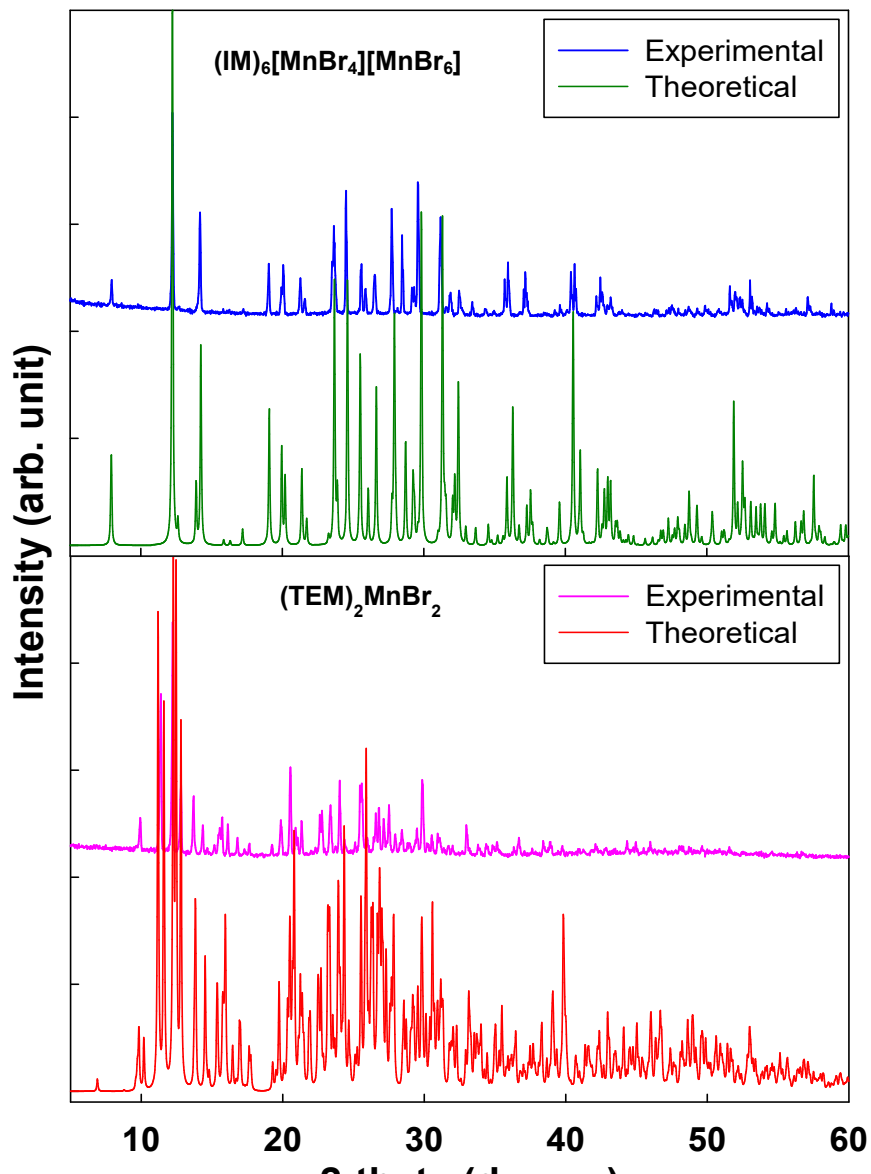

**Figure S2.** Powder X-ray diffraction and the simulated pattern from SCXRD for the  $(\text{IM})_6[\text{MnBr}_4][\text{MnBr}_6]$  and  $(\text{TEM})_2\text{MnBr}_4$  compounds.
